# Supplementary material
Source: publisher site journal article supplement (https://www.spandidos-publications.com/5866/downloadSupplementary)

Figure S1. Forest plot of the RR for the CD30-positive proportion between EBV+ and EBV- DLBCL. EBV, Epstein-Barr virus; DLBCL, diffuse large B-cell lymphoma; RR, relative risk; CI, confidence interval.

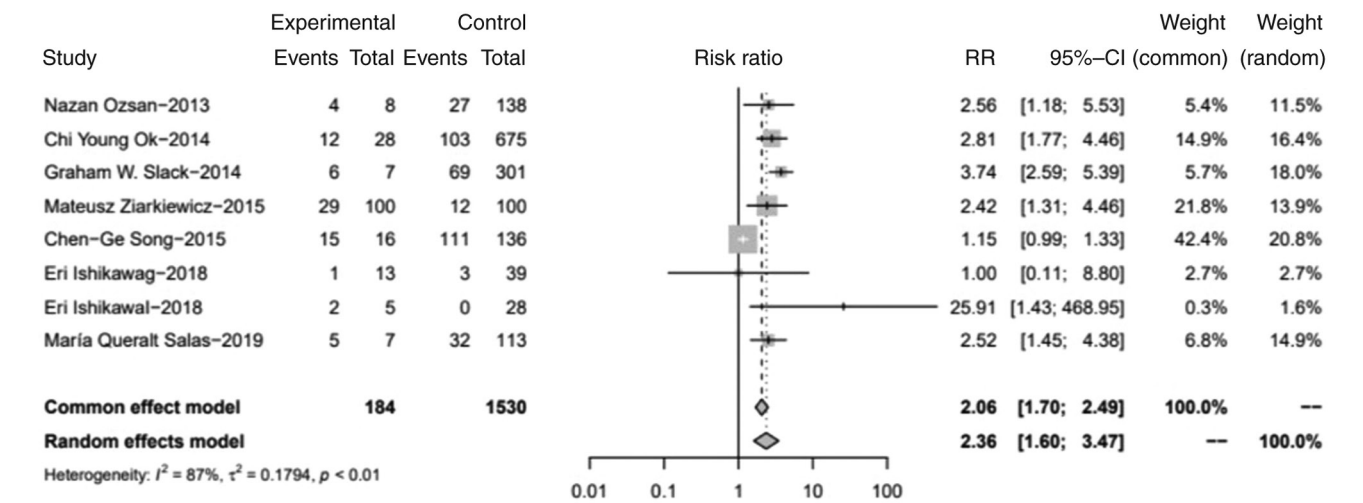

Supplement: Supplementary file 1 [file downloadSupplementary]
